# Supplementary material for: Atezolizumab plus Bevacizumab in Patients with Unresectable or Metastatic Mucosal Melanoma: A Multicenter, Open-Label, Single-Arm Phase II Study
Source: Oxford University Press journal article supplement (doi:10.1158/1078-0432.ccr-22-1528), 2022-08-31
Supplement: ccr-22-1528_supplementary_figure_s2_suppfs2.docx [file ccr-22-1528_supplementary_figure_s2_suppfs2.docx]

**Supplementary Figure S2** Kaplan–Meier curve for overall survival.

**
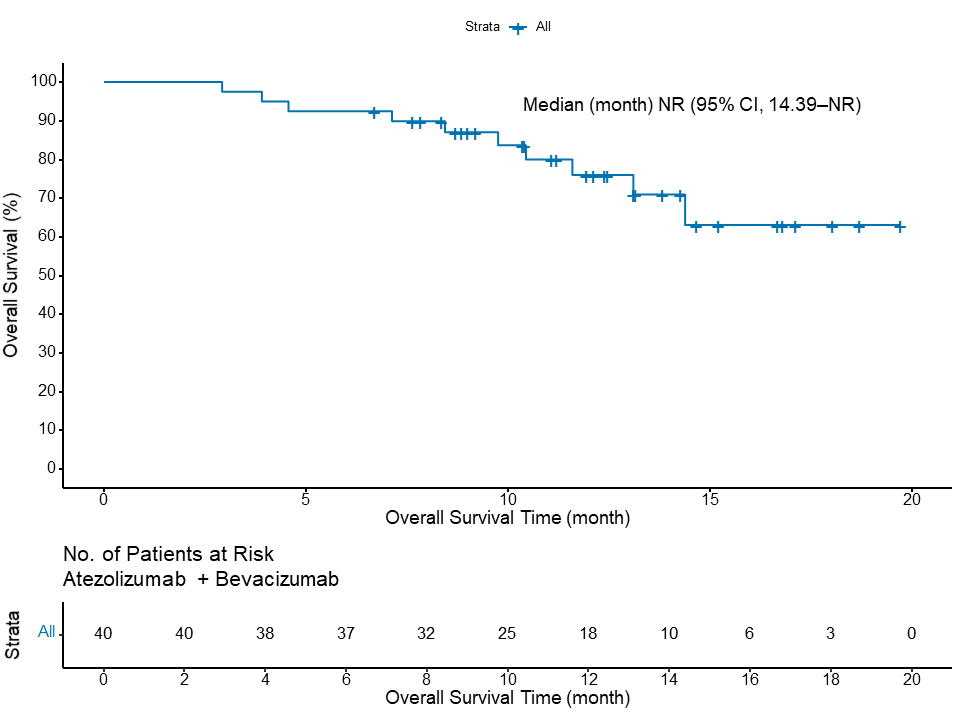
**

CI, confidence interval; NR, not reached.
