# Supplementary material for: Atezolizumab plus Bevacizumab in Patients with Unresectable or Metastatic Mucosal Melanoma: A Multicenter, Open-Label, Single-Arm Phase II Study
Source: Oxford University Press journal article supplement (doi:10.1158/1078-0432.ccr-22-1528), 2022-08-31
Supplement: ccr-22-1528_supplementary_table_s1_suppts1.docx [file ccr-22-1528_supplementary_table_s1_suppts1.docx]

**Supplementary Table S1** Confirmed best overall response rates by advanced stage classification

|  | Unresectable Mucosal Melanoma  (*n* = 18) | Metastatic  Mucosal Melanoma  (*n* = 22) |
| --- | --- | --- |
| Best overall response, *n* (%) |  |  |
| CR | 1 (5.6) | 0 |
| PR | 8 (44.4) | 9 (40.9) |
| SD | 4 (22.2) | 4 (18.2) |
| PD | 4 (22.2) | 9 (40.9) |
| Not evaluable | 1 (5.6) | 0 |
| Objective response rate (CR+PR), *n* (%) | 9 (50.0) | 9 (40.9) |
| (95% CI) | 26–74 | 21–64 |

CI, confidence interval; CR, complete response; PR, partial response; SD, stable disease; PD, progressive disease
