# Supplementary figures and images for: Atezolizumab plus Bevacizumab in Patients with Unresectable or Metastatic Mucosal Melanoma: A Multicenter, Open-Label, Single-Arm Phase II Study
Source: Oxford University Press journal article supplement (doi:10.1158/1078-0432.ccr-22-1528), 2022-08-31

**Supplementary Figure S1.** Patient flow diagram


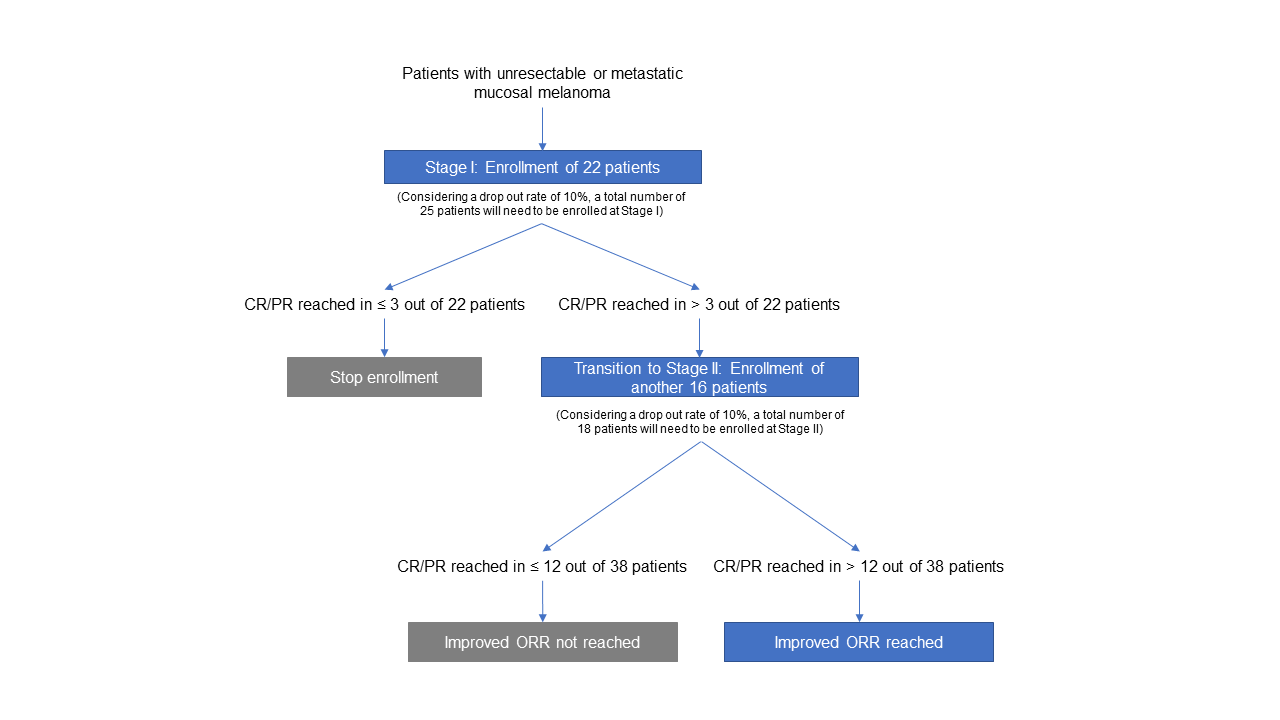


CR, complete response; PR, partial response.

Supplement: ccr-22-1528_supplementary_figure_s1_suppfs1.docx [file ccr-22-1528_supplementary_figure_s1_suppfs1.docx]
